# Supplementary material
Source: publisher figshare collection journal article supplement (https://acs.figshare.com/ndownloader/files/5527301)
Supplement: Supplementary file 1 [file 5527301]

## Supporting information

# Core-Shell-Shell NaYbF<sub>4</sub>:Tm@CaF<sub>2</sub>@NaDyF<sub>4</sub> Nanocomposites for Upconversion/T<sub>2</sub>-weighted MRI/ Computed Tomography Lymphatic Imaging

*Ying Li,<sup>†</sup> Yuyang Gu,<sup>‡</sup> Wei Yuan,<sup>‡</sup> Tianye Cao,<sup>‡</sup> Kai Li,<sup>‡</sup> Shiping Yang,<sup>†</sup> Zhiguo Zhou,<sup>\*†</sup> and Fuyou Li<sup>\*‡</sup>*

<sup>†</sup> The Key Laboratory of Resource Chemistry of Ministry of Education, Shanghai Municipal Education Committee Key Laboratory of Molecular Imaging Probes and Sensors, Shanghai Normal University, Shanghai 200234, P.R. China.

<sup>‡</sup>Department of Chemistry, Fudan University, 220 Handan Road, Shanghai 200433, P.R. China.

### Corresponding Author

\*E-mail: [fyli@fudan.edu.cn](mailto:fyli@fudan.edu.cn) (F. Y. Li). Fax: +86 21 55664185.

\*E-mail: [zgzhou@shnu.edu.cn](mailto:zgzhou@shnu.edu.cn) (Z. G. Zhou). Fax: +86 21 64328981.

**Synthesis of NaDyF<sub>4</sub>:Yb,Tm nanoparticles capped with oleic acid (OA-NaDyF<sub>4</sub>:Yb,Tm).** 0.327 mmol Yb(TFA)<sub>3</sub>, 3  $\mu$ mol Tm(TFA)<sub>3</sub>, 0.67 mmol Dy(TFA)<sub>3</sub> and 1 mmol NaTFA were added to a 100 mL flask containing 2.84 g oleic acid (OA), 2.67 g oleylamine (OM) and 5.04 g 1-octadecene (ODE). The resulting mixture was heated to 110 °C with magnetic stirring to form a transparent solution. The flask was sealed and degassed for 30 min with N<sub>2</sub> gas. The solution was slowly heated to 300 °C and maintained for 30 min under the nitrogen environment. Then, the solution was cooled down to room temperature. The NaDyF<sub>4</sub>:Yb,Tm nanoparticles were collected by centrifugation at 15000 rpm for 10 min and washed several times with ethanol/cyclohexane, after that dispersed in cyclohexane.

**Synthesis of core-shell NaYbF<sub>4</sub>:Tm@NaDyF<sub>4</sub> nanoparticles capped with oleic acid (OA-NaYbF<sub>4</sub>:Tm@NaDyF<sub>4</sub>).** The core-shell NaYbF<sub>4</sub>:Tm@NaDyF<sub>4</sub> nanoparticles were synthesized similarly to that of NaYbF<sub>4</sub>:Tm@CaF<sub>2</sub>. 5 mL as-prepared solution of NaYbF<sub>4</sub>:Tm nanoparticles dispersed in cyclohexane, and 0.5 mmol Dy(TFA)<sub>3</sub> and 0.5 mmol NaTFA were add in a 100 mL flask containing 2.84 g oleic acid (OA), 2.68 g oleylamine (OM) and 5.04 g 1-octadecene (ODE). The mixture was then heated to 110 °C for 30 min to remove the cyclohexane. After the cyclohexane was evaporated, the flask was sealed and degassed for 30 min. Subsequently, the reaction was slowly heated to 300 °C under the nitrogen environment and kept at it for 8 min, then cooling down to room temperature. The NaYbF<sub>4</sub>:Tm@CaF<sub>2</sub> nanoparticles were collected by centrifugation at 15000 rpm and washed several times with ethanol/cyclohexane, then dispersed in cyclohexane.

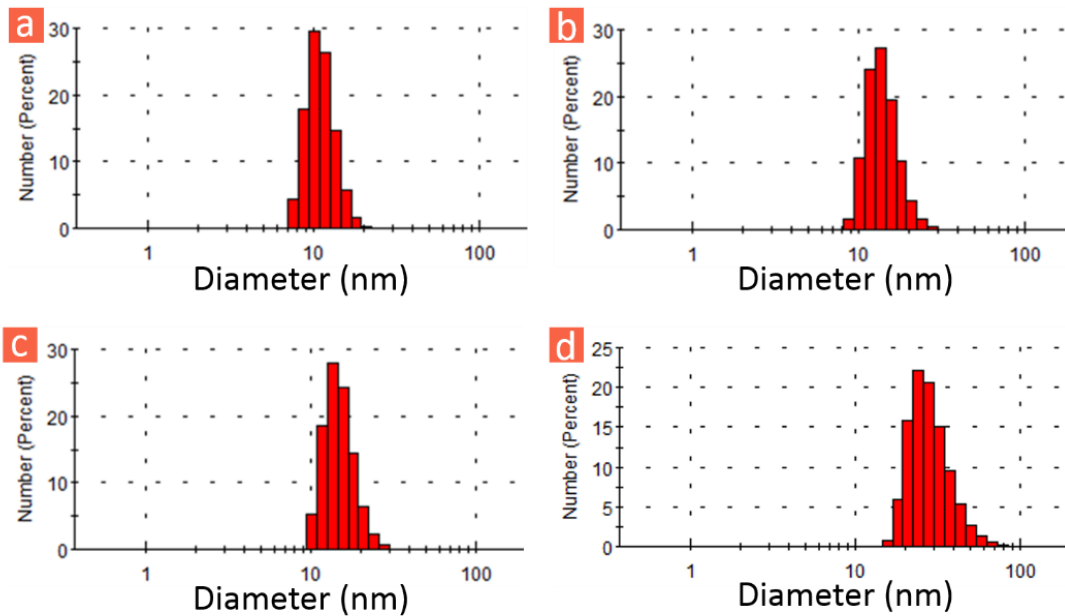

Figure S1. DLS data of these nanoparticles OA-NaYbF<sub>4</sub>:Tm (a), OA-NaYbF<sub>4</sub>:Tm@CaF<sub>2</sub> (b), OA-NaYbF<sub>4</sub>:Tm@CaF<sub>2</sub>@NaDyF<sub>4</sub> and Cit-NaYbF<sub>4</sub>:Tm@CaF<sub>2</sub>@NaDyF<sub>4</sub> (d).

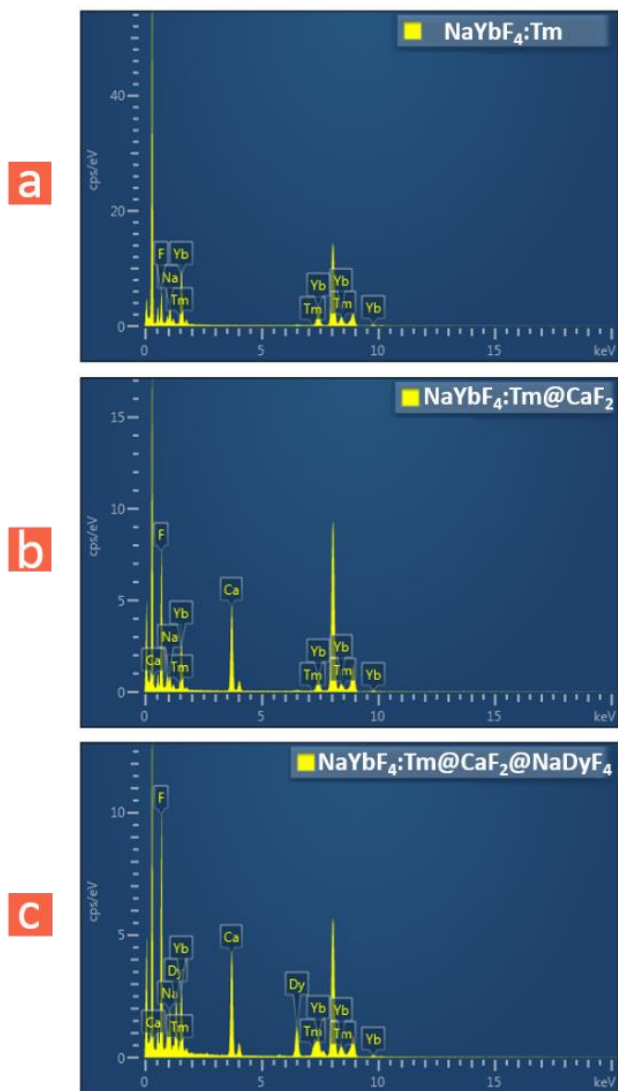

Figure S2. EDXA pattern of these nanoparticles OA-NaYbF<sub>4</sub>:Tm (a), OA-NaYbF<sub>4</sub>:Tm@CaF<sub>2</sub> (b), and OA-NaYbF<sub>4</sub>:Tm@CaF<sub>2</sub>@NaDyF<sub>4</sub> (c).

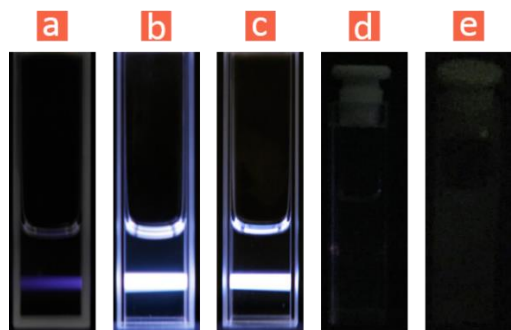

Figure S3. Photograph of the nanoparticles OA-NaYbF<sub>4</sub>:Tm (a) , OA-NaYbF<sub>4</sub>:Tm@CaF<sub>2</sub>, (b) OA-NaYbF<sub>4</sub>:Tm@CaF<sub>2</sub>@NaDyF<sub>4</sub> (c), OA-NaDyF<sub>4</sub>:Yb,Tm (d), OA-NaYbF<sub>4</sub>:Tm@NaDyF<sub>4</sub>:Tm (e) in cyclohexane solution under excitation with a 980 nm laser. The Tm<sup>3+</sup> concentration of all samples was fixed at 1 mg/mL.

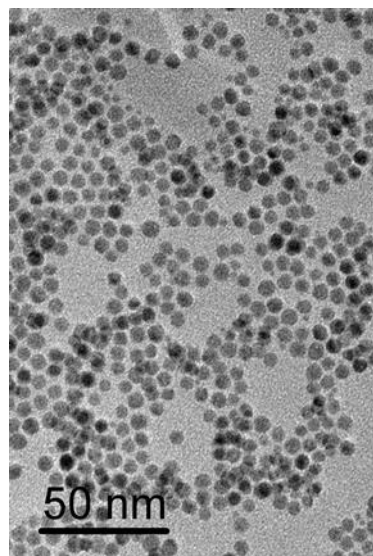

Figure S4. TEM image of the OA-NaDyF<sub>4</sub>:Yb,Tm nanoparticles.

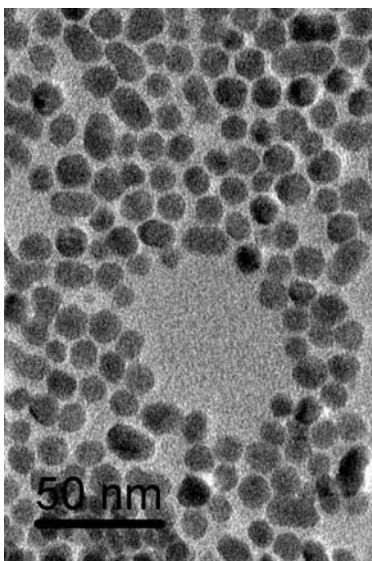

Figure S5. TEM image of the OA-NaYbF<sub>4</sub>:Tm@NaDyF<sub>4</sub> nanoparticles.

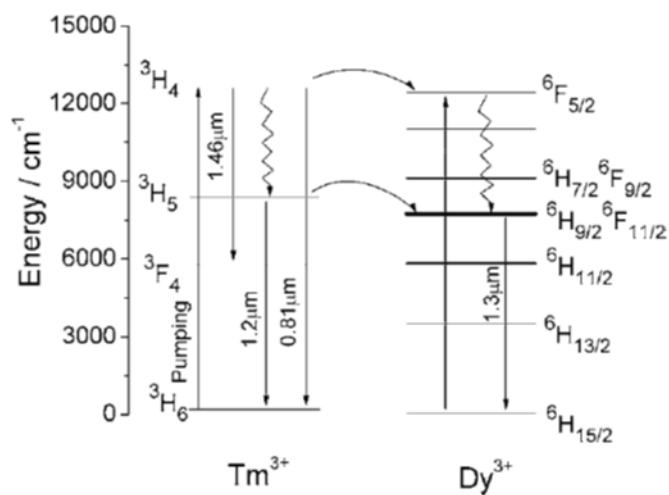

Figure S6. The energy level diagram of Tm<sup>3+</sup> and Dy<sup>3+</sup> showing their energy transfer process.

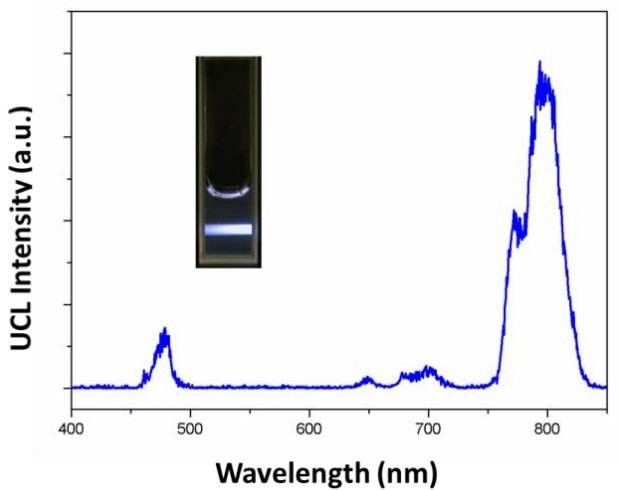

Figure S7. UCL emission spectrum of the nanoparticles Cit-NaYbF<sub>4</sub>:Tm@CaF<sub>2</sub>@NaDyF<sub>4</sub> dispersed in deionized water under excitation at 980 nm.

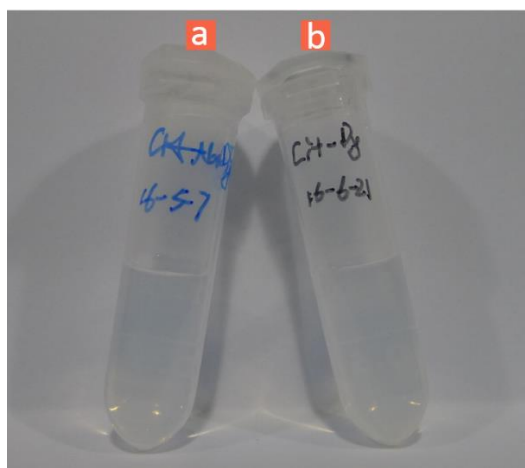

Figure S8. The photo showing the stability of Cit-NaYbF<sub>4</sub>:Tm@CaF<sub>2</sub>@NaDyF<sub>4</sub> (30 mg/mL) dispersed in water for more than one month.

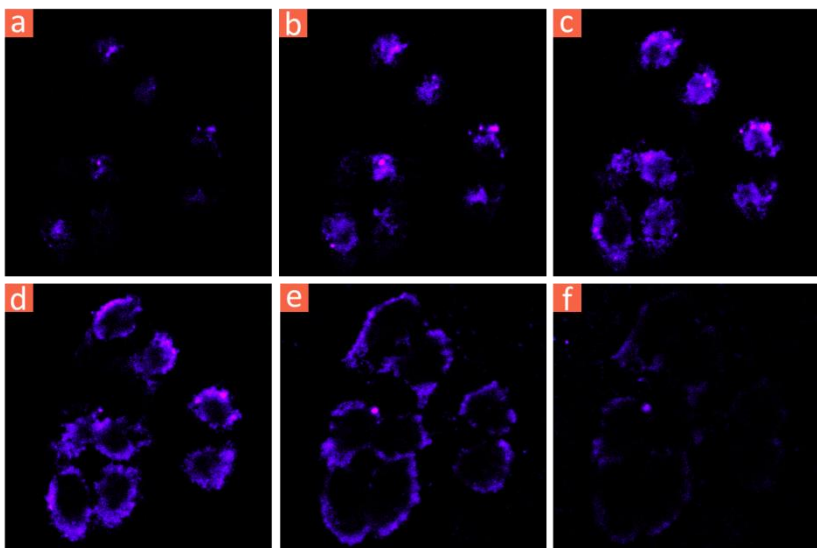

Figure S9. The overlap Z-scan confocal UCL image of the living HeLa cells incubated with 20  $\mu\text{g/mL}$  Cit-NaYbF<sub>4</sub>:Tm@CaF<sub>2</sub>@NaDyF<sub>4</sub> for 90 min at 37 °C ( $\lambda_{\text{ex}} = 980 \text{ nm}$ ).



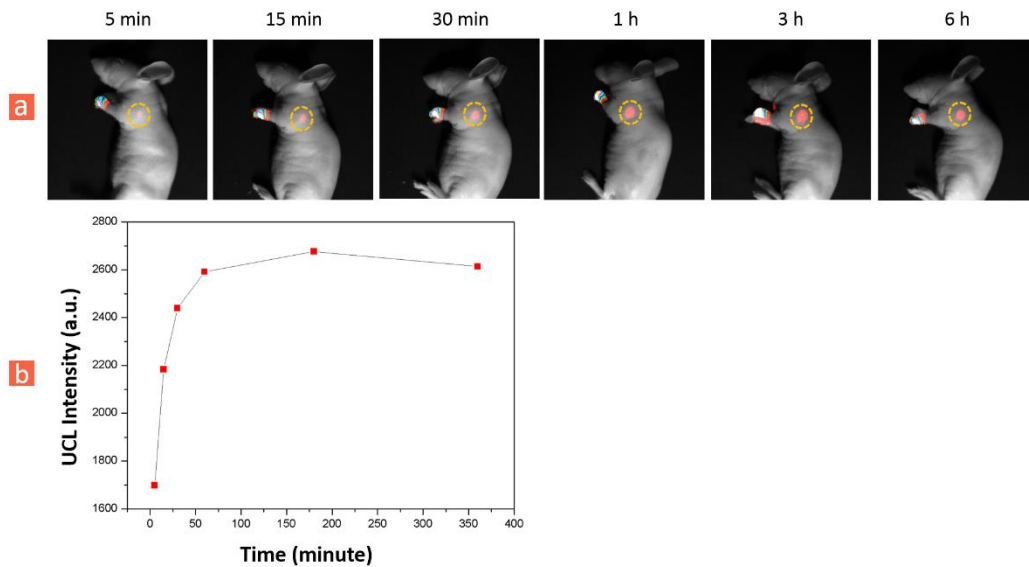

Figure S10. (a) *In vivo* lymphatic drainage of bright-field and UCL imaging overlay images after injection with 50  $\mu\text{L}$  of Cit-NaYbF<sub>4</sub>:Tm@CaF<sub>2</sub>@NaDyF<sub>4</sub> nanocomposites (30 mg/mL) on the left forepaw. All images were acquired under the same instrumental conditions. (Power density: 50  $\text{mW cm}^{-2}$ .  $\lambda_{\text{ex}} = 980 \text{ nm}$ ,  $\lambda_{\text{UCL}} = 800 \pm 12 \text{ nm}$ ). (b) Average UCL intensity measured in region of interest (ROI) at 5, 15, 30, 60, 180 and 360 minutes.
